# Supplementary material
Source: PubMed Central journal article supplement (PMC10524732)
Supplement: NIHMS1897984-supplement-2.pdf [file NIHMS1897984-supplement-2.pdf]

**Table S1. Characteristics of healthy patients and patients with non-alcoholic fatty liver disease related to Figures 1 and 2**

| <b>Variable</b>          | <b>Healthy (N=9)</b> | <b>NAFLD (N=11)</b>  | <b>P-value</b>    |
|--------------------------|----------------------|----------------------|-------------------|
| Age (Years)              |                      |                      |                   |
| Mean ( $\pm$ SD)         | 34.56 ( $\pm$ 6.41)  | 48.18 ( $\pm$ 12.26) | <b>0.008</b>      |
| Gender                   |                      |                      |                   |
| Male                     | 6 (66.67)            | 4 (36.36)            | 0.370             |
| Female                   | 3 (33.33)            | 7 (63.64)            |                   |
| Race/Ethnicity           |                      |                      |                   |
| Caucasian                | 2 (22.22)            | 6 (54.55)            | <b>0.008</b>      |
| African American         | 0 (0)                | 1 (9.09)             |                   |
| Asian                    | 7 (77.78)            | 1 (9.09)             |                   |
| Other                    | 0 (0)                | 3 (27.27)            |                   |
| ALT (U/L)                |                      |                      |                   |
| Median ( $\pm$ SD)       | 30.22 ( $\pm$ 9.58)  | 29.91 ( $\pm$ 18.05) | 0.963             |
| AST (U/L)                |                      |                      |                   |
| Mean ( $\pm$ SD)         | 27 ( $\pm$ 6.65)     | 23.27 ( $\pm$ 7.95)  | 0.277             |
| BMI (kg/m <sup>2</sup> ) |                      |                      |                   |
| Mean ( $\pm$ SD)         | 21.56 ( $\pm$ 1.75)  | 36.94 ( $\pm$ 7.12)  | <b>&lt; 0.001</b> |
| Fatty liver              |                      |                      |                   |
| 0                        | 9 (100)              | 0 (0)                | NA                |
| < 33%                    | 0 (0)                | 7 (63.64)            |                   |
| 33–66%                   | 0 (0)                | 3 (27.27)            |                   |
| > 66%                    | 0 (0)                | 1 (9.09)             |                   |

Data are presented as number of patients (%), mean ( $\pm$  SD), or median (IQR).  

*p*-values were calculated by two-sample t-test or Mann-Whitney test for continuous variables and by chi-squared test or Fisher's exact test for categorical variables, as appropriate.  
<sup>a</sup>ALT, alanine aminotransferase; AST, aspartate aminotransferase; BMI, body mass index; IQR, interquartile range; NA, not applicable; NAFLD, non-alcoholic fatty liver disease; SD, standard deviation.

**Table S2. Characteristics of patients with and without non-alcoholic fatty liver disease related to Figure 7A and 7B.**

| <b>Variable</b>          | <b>Normal (N=18)</b> | <b>NAFLD (N=16)</b>  | <b>P-value</b> |
|--------------------------|----------------------|----------------------|----------------|
| Age at Biopsy (Years)    |                      |                      |                |
| Mean ( $\pm$ SD)         | 54.22 ( $\pm$ 15)    | 61.56 ( $\pm$ 12.15) | 0.130          |
| Gender                   |                      |                      |                |
| Male                     | 11 (61.11)           | 9 (56.25)            | 0.774          |
| Female                   | 7 (38.89)            | 7 (43.75)            |                |
| Race/Ethnicity           |                      |                      |                |
| Caucasian                | 10 (55.56)           | 9 (56.25)            | 0.361          |
| African American         | 0 (0)                | 2 (12.5)             |                |
| Asian                    | 4 (22.22)            | 1 (6.25)             |                |
| Other                    | 4 (22.22)            | 4 (25)               |                |
| Chemotherapy             |                      |                      |                |
| Yes                      | 14 (77.78)           | 14 (87.5)            | 0.660          |
| No                       | 4 (22.22)            | 2 (12.5)             |                |
| BMI (kg/m <sup>2</sup> ) |                      |                      |                |
| Median (IQR)             | 23.43 (21.46–26.22)  | 28.19 (25.3–34.55)   | <b>0.003</b>   |
| Fatty liver              |                      |                      |                |
| 0                        | 18 (100)             | 0 (0)                | NA             |
| < 33%                    | 0 (0)                | 10 (62.5)            |                |
| 33–66%                   | 0 (0)                | 1 (6.25)             |                |
| > 66%                    | 0 (0)                | 5 (31.25)            |                |

Data are presented as number of patients (%), mean ( $\pm$  SD), or median (IQR).

*p*-values were calculated by two-sample t-test or Mann-Whitney for continuous variables and by chi-squared test or Fisher's exact test for categorical variables, as appropriate.

<sup>a</sup>BMI, body mass index; IQR, interquartile range; NA, not applicable; SD, standard deviation.

**Table S3. Characteristics of patients with and without non-alcoholic fatty liver disease related to Figure 7C–G.**

| <b>Variable</b>          | <b>Normal (N=17)</b> | <b>NAFLD (N=13)</b> | <b>P-value</b> |
|--------------------------|----------------------|---------------------|----------------|
| Age at Biopsy (Years)    |                      |                     |                |
| Mean ( $\pm$ SD)         | 55.18 ( $\pm$ 15.48) | 59.23 ( $\pm$ 11.5) | 0.436          |
| Gender                   |                      |                     |                |
| Male                     | 11 (64.71)           | 6 (46.15)           | 0.310          |
| Female                   | 6 (35.29)            | 7 (53.85)           |                |
| Race/Ethnicity           |                      |                     |                |
| Caucasian                | 8 (47.06)            | 6 (46.15)           | 0.526          |
| African American         | 0 (0)                | 2 (15.38)           |                |
| Asian                    | 3 (17.65)            | 1 (7.69)            |                |
| Other                    | 6 (35.29)            | 4 (30.77)           |                |
| Chemotherapy             |                      |                     |                |
| Yes                      | 13 (76.47)           | 11 (84.62)          | 0.672          |
| No                       | 4 (23.53)            | 2 (15.38)           |                |
| BMI (kg/m <sup>2</sup> ) |                      |                     |                |
| Median (IQR)             | 22.91 (21.46–25.92)  | 29.29 (25.27–34.77) | <b>0.003</b>   |
| Fatty liver              |                      |                     |                |
| 0                        | 17 (100)             | 0 (0)               | NA             |
| < 33%                    | 0 (0)                | 8 (61.54)           |                |
| 33–66%                   | 0 (0)                | 1 (7.69)            |                |
| > 66%                    | 0 (0)                | 4 (30.77)           |                |

Data are presented as number of patients (%), mean ( $\pm$  SD), or median (IQR).

*p*-values were calculated by two-sample t-test or Mann-Whitney test for continuous variables and by chi-squared test or Fisher's exact test for categorical variables, as appropriate.

<sup>a</sup>BMI, body mass index; IQR, interquartile range; NA, not applicable; SD, standard deviation.

**Table S4. Antibody list for Imaging Mass Cytometry analysis of Human Colorectal Cancer and Liver Metastasis related to Figure 7**

|    | Metal | Antibody       | Clone         | Cell subsets             | Vendor              | Cat #      |
|----|-------|----------------|---------------|--------------------------|---------------------|------------|
| 1  | 113In | aSMA           | 1A4/ASM-1     | myofibroblast            | Novus Biologicals   | NBP2-34522 |
| 2  | 115In | CD31           | C31.3         | endothelium, vessels     | Abcam               | ab212709   |
| 3  | 142Nd | Galectin-9     | 1G3           | TIM3 ligand              | EMD Millipore       | MABT833    |
| 4  | 143Nd | YAP1           | EP1674Y       | tumor marker             | Abcam               | ab172373   |
| 5  | 144Nd | CD14           | EPR3653       | monocyte, macrophage     | Fluidigm            | 3144025D   |
| 6  | 145Nd | Cytokeratin 19 | RCK108        | cytokeratin, bile ducts  | Novus Biologicals   | NBP1-97712 |
| 7  | 147Sm | CD163          | EDHu-1        | M2 macrophage            | Fluidigm            | 3147021D   |
| 8  | 148Nd | NKG2D          | pAb           | NK cells                 | Novus Biologicals   | NBP2-43645 |
| 9  | 150Nd | PDL1           | 28-8          | immunoregulatory         | Abcam               | ab228413   |
| 10 | 151Eu | FAP            | pAb           | CaF                      | R&D Systems         | AF3715     |
| 11 | 152Sm | CD11c          | ITGAX/1242    | DC                       | Abcam               | ab212508   |
| 12 | 153Eu | LAG-3          | D2G40         | immunoregulatory         | Fluidigm            | 3153028D   |
| 13 | 154Sm | HepPar1        | HepPar1/V3109 | hepatocyte               | NSJ Bioreag         | V3109SAF   |
| 14 | 155Gd | FOXP3          | 236A/E7       | Treg                     | Fluidigm            | 3155016D   |
| 15 | 156Gd | CD4            | EPR6855       | T helper                 | Fluidigm            | 3156033D   |
| 16 | 159TB | CD68           | KP1           | macrophages              | Fluidigm            | 3159035D   |
| 17 | 160Gd | VISTA          | D1L2G         | myeloid checkpoint       | Fluidigm            | 3160025D   |
| 18 | 161Dy | CD20           | H1            | B cells                  | Fluidigm            | 3161029D   |
| 19 | 162Dy | CD8a           | C8/144B       | cytotoxic T cells        | Fluidigm            | 3162034D   |
| 20 | 163Dy | TIM3           | D5D5R         | immunoregulatory         | Cell Signaling Tech | 81229SF    |
| 21 | 165Ho | PD1            | NAT105        | immunoregulatory         | Abcam               | ab201811   |
| 22 | 166Er | iNOS           | SP126         | M1 macrophage/hepatocyte | Abcam               | ab239990   |
| 23 | 168Er | CDX-2          | 2951R         | tumor marker             | Novus Biologicals   | NBP3-08738 |
| 24 | 170Er | CD3            | pAb           | pan T-cell               | Fluidigm            | 3170019D   |
| 25 | 172Yb | CD15           | HI98          | myeloid, granulocytes    | Biologend           | 301902     |
| 26 | 173Yb | CD11b          | EPR1344       | macrophages              | Abcam               | ab209970   |
| 27 | 196Pt | Ki-67          | B56           | proliferation            | BD Biosciences      | 556003     |
| 28 | 209Bi | Histone H3     | EPR16987      | nuclear                  | Abcam               | ab238971   |
| 29 | 89Y   | CD45           | D9M8I         | pan leukocytes           | Cell Signaling Tech | 47937      |
| 30 | 139La | HLA-ABC        | EMR8-5        | MHC class I              | Abcam               | Ab70328    |
| 31 | 174Yb | HLA-DR         | L243          | MHC class II, MDSC, APC  | Fluidigm            | 3174023D   |
|    |       |                |               |                          |                     |            |

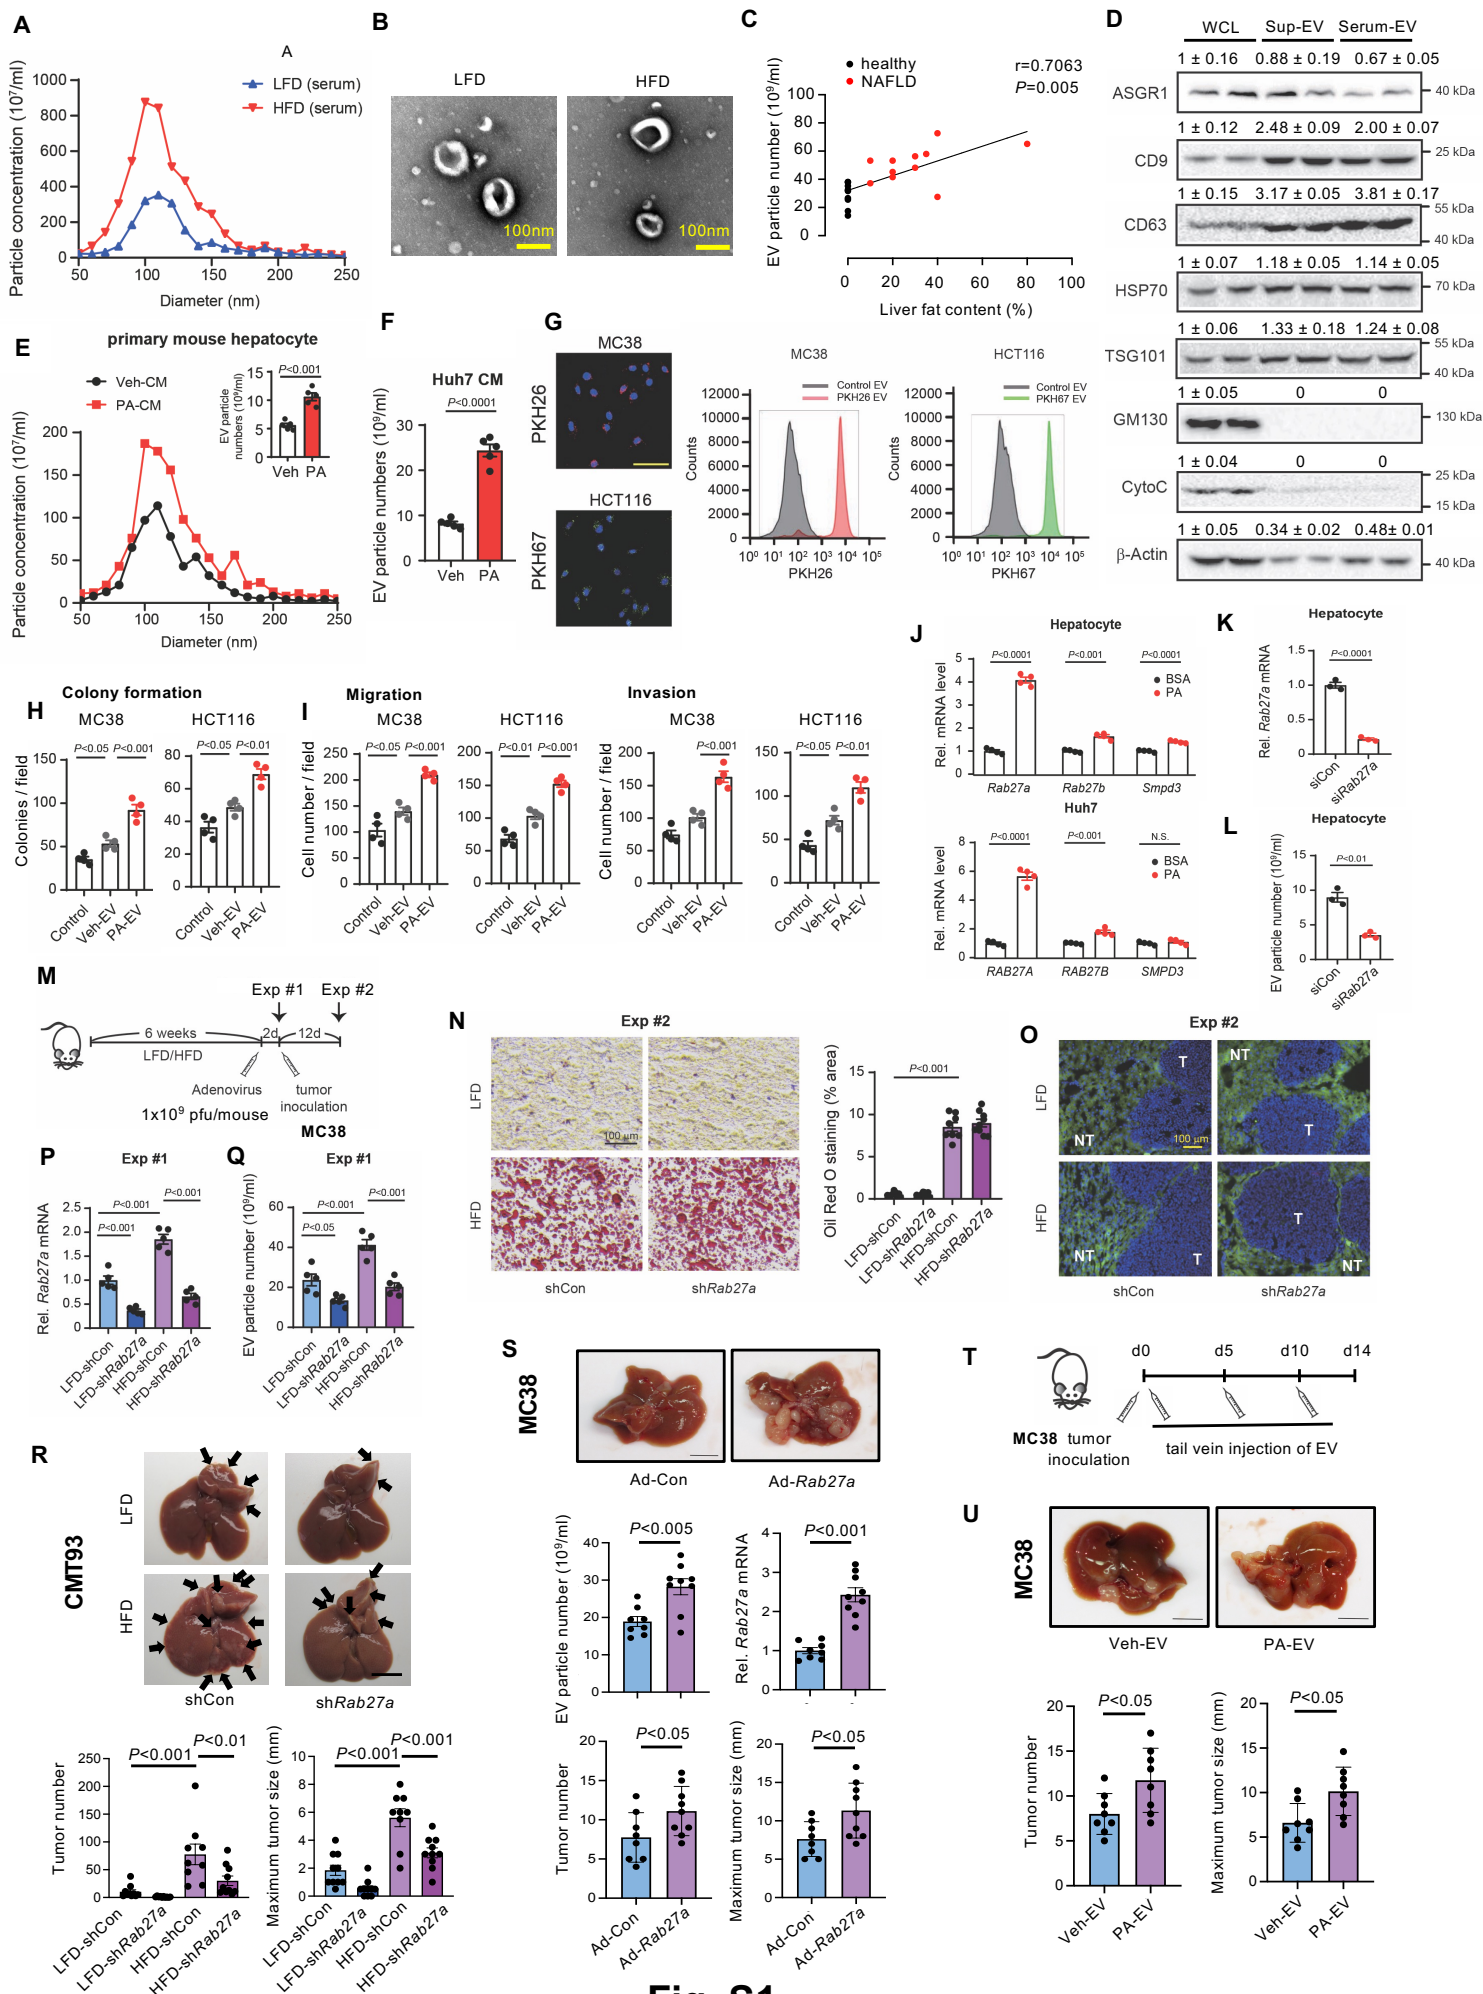

Fig. S1

**Figure S1. Increased Extracellular Vesicle Release by Fatty Liver Enhances Metastatic Tumor Growth in the Liver, Related to Figure 1**

- (A) Particle size distribution of EVs assessed using a qNANO instrument. Mouse sera were obtained by the procedure outlined in Figure 1A.
- (B) Transmission electron microscopy images of EVs from PHCs of LFD and HFD-fed mice.
- (C) The correlation between serum EV particle number and liver fat content in healthy and NAFLD patients.
- (D) Immunoblots and quantifications of lysates of mouse PHCs (WCL), EVs from supernatants of mouse PHCs (Sup-EV), and EVs from mouse serum (Serum-EV).
- (E) Numbers of EV particles obtained from supernatants of Huh7 cells treated with Veh or 400  $\mu$ M PA for 24 hours (n=5/group) were assessed using a qNANO instrument.
- (F) Particle size distribution and numbers of EVs from mouse hepatocytes treated with Veh or 400  $\mu$ M PA for 24 hours were assessed using a qNANO instrument.
- (G) The uptake of fluorescently labeled EVs in MC38 and HCT116 cells was examined. EVs were obtained from mouse PHCs and Huh7 cells treated with PA and then labeled with PKH26 (red) and PKH67 (green), respectively. Fluorescently labeled EVs were incubated with MC38 or HCT116 cells for 24 hours followed by assessing the uptake of EVs through microscope (**left**) or Flow cytometry (**right**). Scale bar, 50 nm.
- (H) MC38 or HCT116 cells were treated with vehicle (Control) or EVs from cells treated with vehicle (Veh-EV) or 400  $\mu$ M PA (PA-EV) for 48 hours, and then colony-forming assays were performed and quantified (n=4/group).
- (I) In vitro cell migration and invasion assay. MC38 or HCT116 cells were treated with vehicle (Control), Veh-EV, or PA-EV for 48 hours and then placed in the upper chamber. The migration and invasion to the lower chamber were quantified (n=4/group).
- (J) *Rab27a*, *Rab27b*, and *Smpd3* mRNA expression were examined by qRT-PCR. Mouse PHCs and Huh7 cells were treated with vehicle (BSA) or 400  $\mu$ M PA for 24 hours (n=4/group).
- (K) qRT-PCR for *Rab27a* mRNA in mouse PHCs. Cells were transfected with non-targeting siRNA control (siCon) or siRNA against *Rab27a* (si*Rab27a*) for 48 hours (n=3/group).
- (L) EV particle numbers were counted using a qNANO instrument. Hepatocytes were transfected with siCon or si*Rab27a* for 48 hours followed by treated with 40  $\mu$ M PA for 24 hours. EVs were purified from supernatants of these cells (n=3/group).
- (M) Protocol for in vivo adenovirus-mediated delivery of shRNA. After 6 weeks of LFD or HFD feeding, adenovirus expressing either sh*Rab27a* or shCon ( $1 \times 10^9$  pfu/mouse) was administered intravenously. These adenovirus vectors contained genes expressing GFP. For experiment 1 (Exp #1), liver and serum samples were harvested 48 hours after adenoviral inoculation (n=5/group). For experiment 2 (Exp #2), MC38 cells ( $1 \times 10^5$  cells/mouse) were injected into the spleen 48 hours after adenoviral inoculation; liver and serum samples were harvested 12 days later (n=8-9/group).
- (N) Oil Red O staining of liver samples from Exp #2. Representative images and quantifications.

(O) Images of efficacy of adenovirus infection by assessment of GFP expression. Both shCon and sh*Rab27a* exclusively infected hepatocytes and not tumor cells.

(P) Hepatic *Rab27a* mRNA expression in non-tumor livers from Exp #1.

(Q) EV particle numbers in serum samples collected from Exp #1.

(R) After 6 weeks of LFD or HFD feeding, adenovirus expressing short hairpin RNA (shRNA) for *Rab27a* (sh*Rab27a*) or a scrambled-shRNA control (shCon) was administered intravenously to mice. CMT93 cells were injected into the spleen 48 hours after adenoviral vector administration (n=9-10/group).

Representative macroscopic images. Scale bar, 1 cm. Number of metastatic tumors, and maximum tumor size.

(S) Adenovirus expressing *Rab27a* (Ad-*Rab27a*) or a control adenovirus (Ad-Con) was administered intravenously to mice. MC38 cells were injected into the spleen 48 hours after adenoviral vector administration (n=8-9/group).

Macroscopic images. Scale bar, 1 cm. EV particle numbers in mouse serum. Hepatic *Rab27a* mRNA expression in non-tumor liver tissues. Number of metastatic tumors, and maximum tumor size.

(T) Protocol for in vivo EV administrations. EVs were extracted from PHCs treated with vehicle (Veh-EV) or 400  $\mu$ M PA (PA-EV) for 48 hours. After 6 weeks of LFD or HFD feeding, MC38 cells were injected into the spleen (n=8/group). 100  $\mu$ g of EVs were administered intravenously to mice on day 0, 5, and 10 after tumor inoculations.

(U) Macroscopic images. Scale bar, 1 cm. Number of metastatic tumors, and maximum tumor size.

Data shown as mean  $\pm$  SEM (F,H-L,N,P-S,U). Significance determined by two-tailed Student's *t*-test (F,J-L,S,U) or one-way ANOVA with Tukey's *post hoc* analysis (H,I,N,P,Q,R).

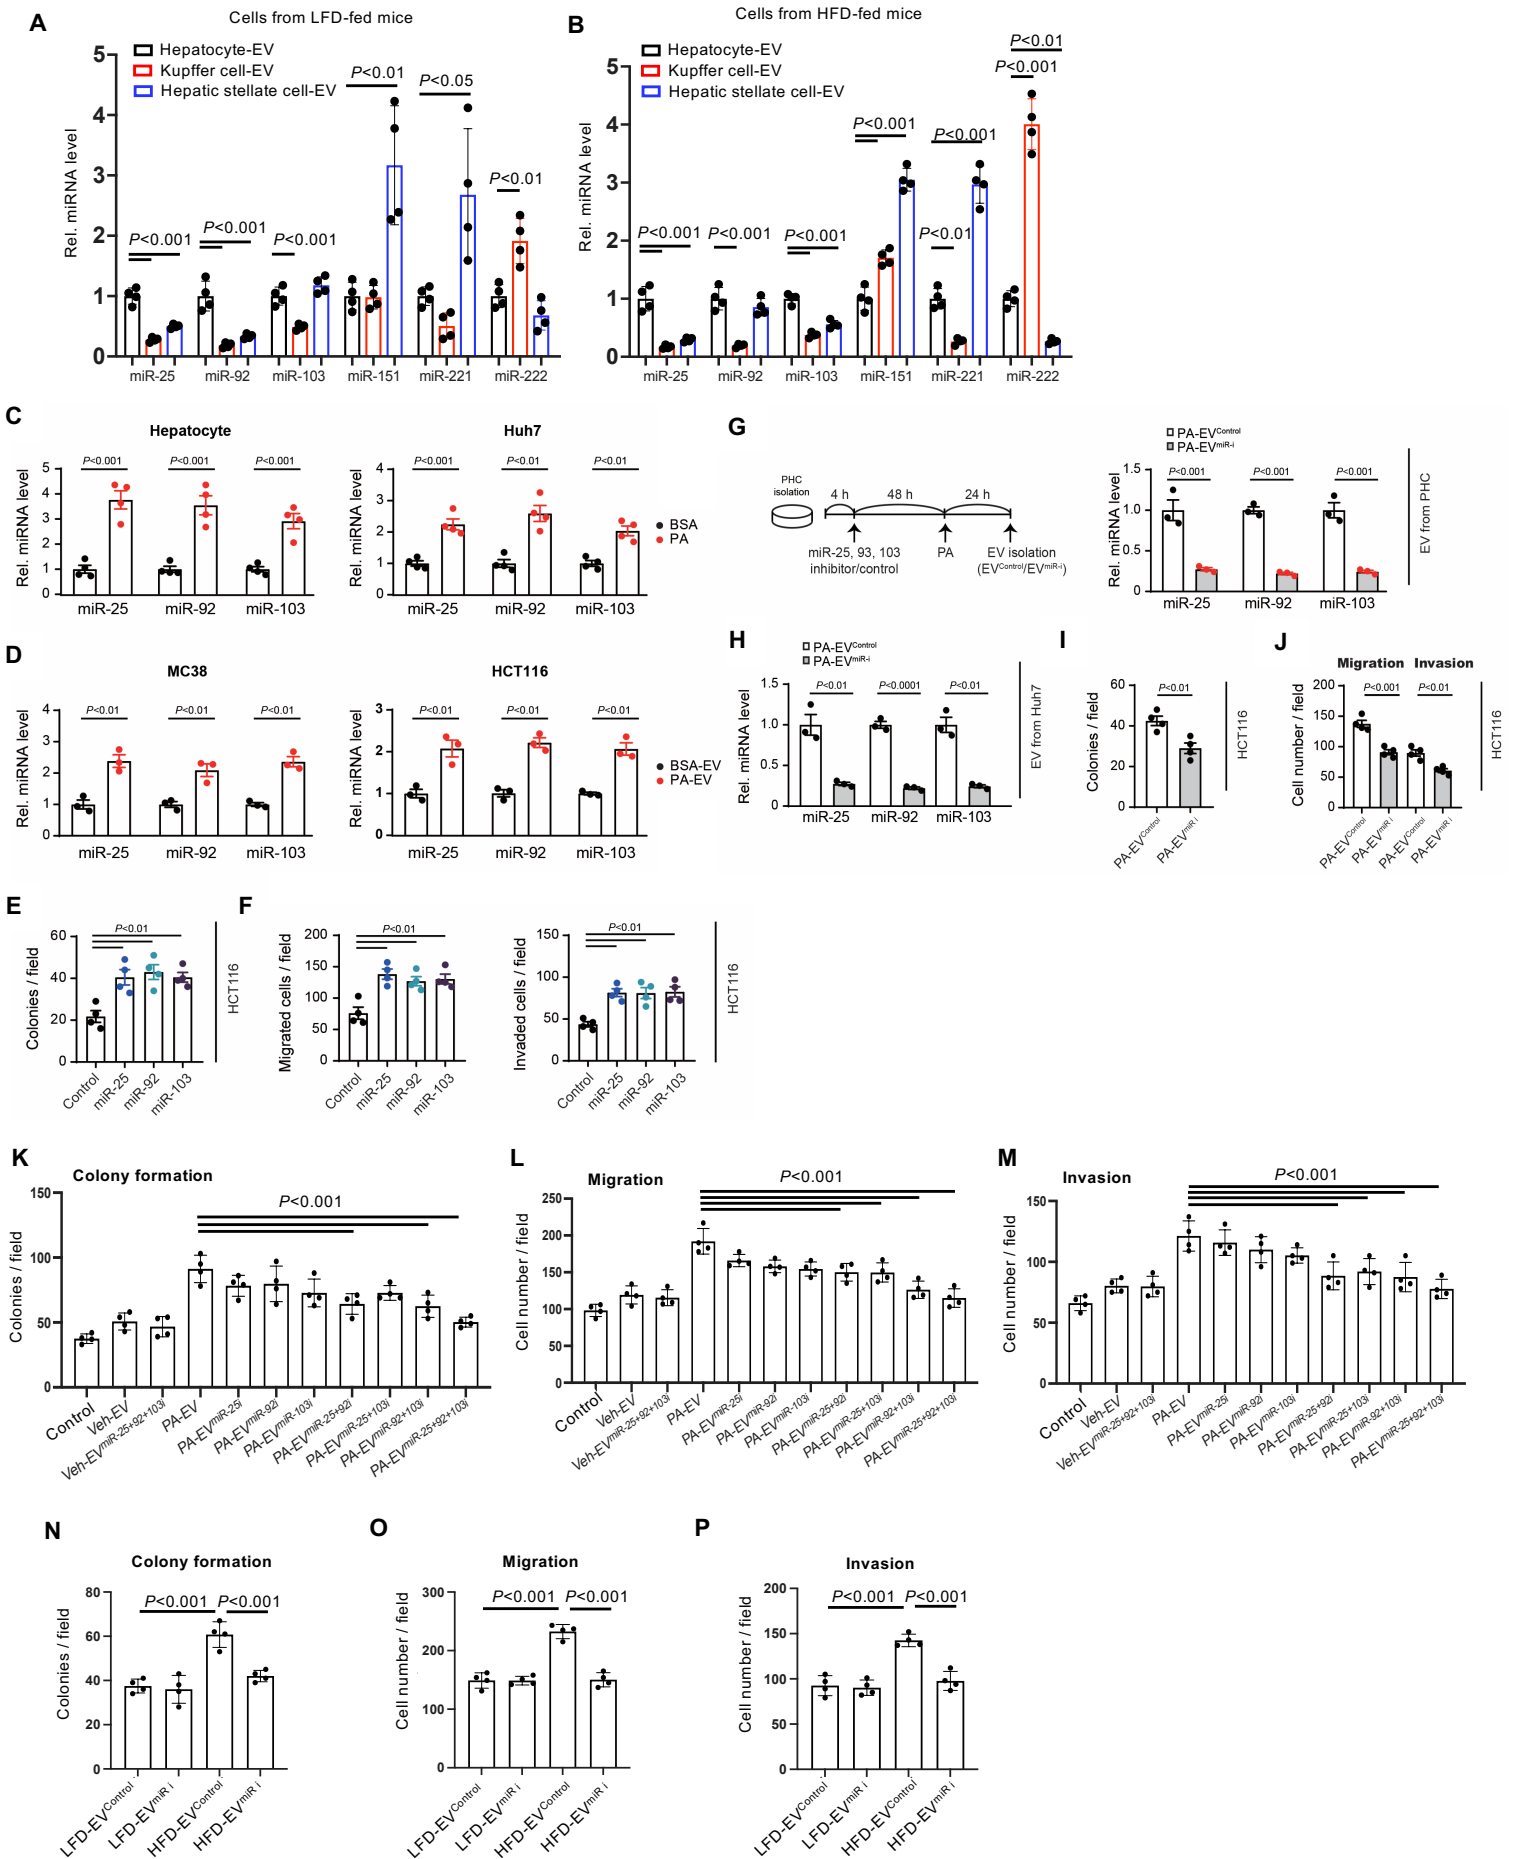

**Fig. S2**



**Figure S2. MiRNAs Are the Functional Extracellular Vesicle Contents That Aggravate Colorectal Cancer Growth in Fatty Liver, Related to Figure 2**

(A,B) qRT-PCR assay for miR-25, miR-92, miR-103, miR-151, miR-221, miR-222 in EVs from primary hepatocytes, Kupffer cells, and hepatic stellate cells of mice fed a LFD (A) or a HFD (B) for 6 weeks. (n=4/group).

(C) qRT-PCR assay for miR-25, miR-92, and miR-103 in mouse hepatocytes and Huh7 cells treated with vehicle (BSA) or 400  $\mu$ M PA for 24 hours (n=4/group).

(D) qRT-PCR assay for miR-25, miR-92, and miR-103 in MC38 cells or HCT116 cells. EVs were obtained from mouse PHCs and Huh7 cells treated with vehicle (BSA) or 400  $\mu$ M PA for 24 hours and MC38 and HCT116 cells were then treated with EVs for 48 hours, respectively.

(E) Colony formation assay. HCT116 cells were transfected with negative control miRNA (Control), miR-25, miR-92, and miR-103 mimics (50 nM each) for 48 hours followed by performing colony formation assay. The average colony numbers per field are shown (n=4/group).

(F) Transwell cell migration and invasion assay. HCT116 cells were transfected with negative control (Control) or with miR-25, miR-92, or miR-103 mimics (50 nM each) for 48 hours followed by placing cells on the upper chamber. Quantification of migrated and invaded cells (n=4/group).

(G) Protocol for in vitro transfection of a combination of antagomiRs for miR-25, miR-92 and miR-103. Four hours after mouse primary hepatocytes (PHC) seeding, cells were transfected with a combination of three antagomiRs or a negative control antagomiR (100 nM each) for 48 hours. Then, cells were treated with 400  $\mu$ M PA for an additional 24 hours. EVs were collected from the supernatants of PHCs (PA-EV<sup>miR-i</sup> or PA-EV<sup>Control</sup>). EV miRNAs were measured by qRT-PCR assay (n=3/group).

(H) In a similar protocol as (G), four hours after seeding, Huh7 cells were transfected with a combination of three antagomiRs or a negative control antagomiR for 48 hours. Then, cells were treated with 400  $\mu$ M PA for an additional 24 hours. EVs were collected from the supernatants of Huh7 cells (PA-EV<sup>miR-i</sup> or PA-EV<sup>Control</sup>). EV miRNAs were determined by qRT-PCR assay (n=3/group).

(I) Colony-forming assay. HCT116 cells were treated with PA-EV<sup>miR-i</sup> or PA-EV<sup>Control</sup> (100  $\mu$ g/ml) for 48 hours followed by performing colony formation assay (n=4/group).

(J) Transwell migration and invasion assay. HCT116 cells were treated with medium containing PA-EV<sup>miR-i</sup> or PA-EV<sup>Control</sup> (100  $\mu$ g/ml) for 48 hours and then placed in the top chamber. The migration and invasion to the lower chamber were assessed (n=4/group).

(K) The effect of EVs with single or combinations of 2 antagomiRs for miR-25, miR-92, and miR-103 on MC38 cells. Four hours after mouse PHC seeding, cells were transfected with single or combinations of 2 or 3 antagomiRs (100 nM each) for 48 hours. Then, cells were treated with vehicle (BSA) or 400  $\mu$ M PA for an additional 24 hours. EVs were collected from the supernatants of PHCs (Veh-EV<sup>miR-i</sup> or PA-EV<sup>miR-i</sup>). Colony-forming assay. MC38 cells were

treated with various EVs (100  $\mu\text{g/ml}$ ) for 48 hours followed by performing colony formation assay (n=4/group).

**(L,M)** Transwell migration (L) and invasion (M) assay. MC38 cells were treated with medium containing various EVs (100  $\mu\text{g/ml}$ ) for 48 hours and then placed in the top chamber. The migration and invasion to the lower chamber were assessed (n=4/group).

**(N)** The effects of EVs from PHC isolated from LFD or HFD-fed mice on MC38 cells. Four hours after the seeding of PHC from LFD or HFD-fed mice, cells were transfected with a combination of three antagomiRs or a negative control antagomiR (100 nM each) for 48 hours. EVs were collected from the supernatants of PHC (LFD-EV<sup>Control</sup>, LFD-EV<sup>miR-i</sup>, HFD-EV<sup>Control</sup>, or HFD-EV<sup>miR-i</sup>). Colony-forming assay. MC38 cells were treated with LFD-EV<sup>Control</sup>, LFD-EV<sup>miR-i</sup>, HFD-EV<sup>Control</sup>, or HFD-EV<sup>miR-i</sup> (100  $\mu\text{g/ml}$ ) for 48 hours followed by performing colony formation assay (n=4/group).

**(O,P)** Transwell migration (O) and invasion (P) assay. MC38 cells were treated with medium containing LFD-EV<sup>Control</sup>, LFD-EV<sup>miR-i</sup>, HFD-EV<sup>Control</sup>, or HFD-EV<sup>miR-i</sup> (100  $\mu\text{g/ml}$ ) for 48 hours and then placed in the top chamber. The migration and invasion to the lower chamber were assessed (n=4/group).

Data are shown as mean  $\pm$  SEM (A-P). Data were analyzed by two-tailed Student's *t*-test (C,D,G-J) or one-way ANOVA with Tukey's *post hoc* analysis (A,B,E,F,K-P).

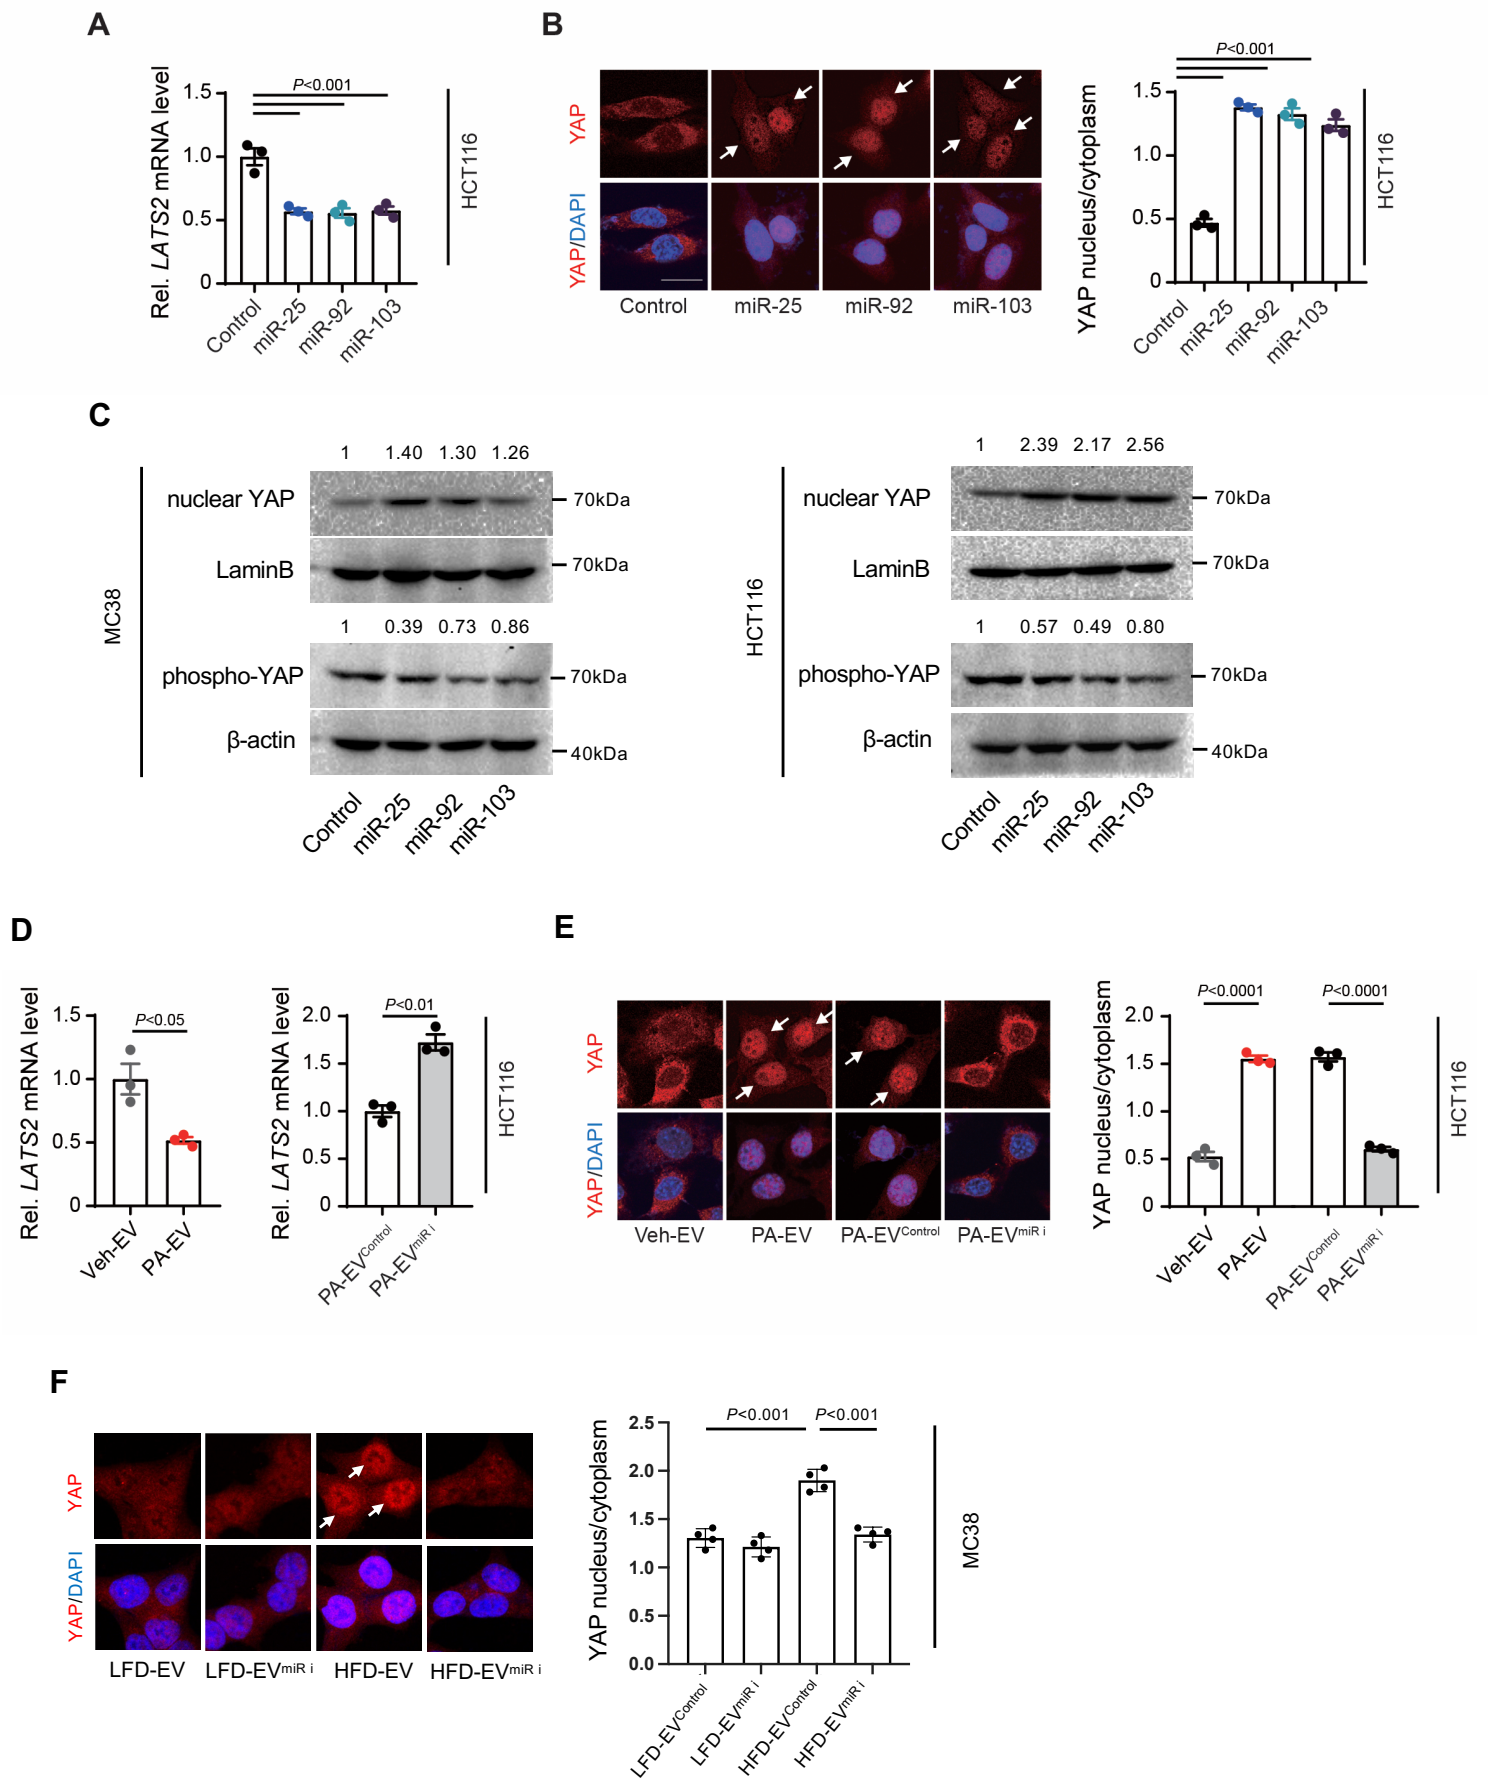

**Fig. S3**

**Figure S3. Extracellular vesicle-miRNAs Promote YAP Activation in Colorectal Cancer Cells, Related to Figure 3**

(A) qRT-PCR assay for *LATS2* in the lysates of HCT116 cells transfected with negative control miRNA or with miR-25, miR-92, or miR-103 mimics (50 nM each) for 48 hours (n=3/group).

(B) HCT116 cells were transfected with negative control miRNA or with miR-25, miR-92, or miR-103 mimics (50 nM each) for 48 hours. The localization of YAP in HCT116 cells was examined. Representative immunofluorescence staining images (left). Corresponding nuclear/cytoplasmic YAP ratios are shown (right) (n=3/group). Scale bar, 10 nm.

(C) Immunoblots for nuclear YAP in nuclear fractions and phospho-YAP in whole cell lysates from MC38 and HCT116 cells treated with negative control miRNA or with miR-25, miR-92, or miR-103 mimics (50 nM each) for 48 hours.

(D) qRT-PCR assay for *LATS2* in the lysates of HCT116 cells treated with EVs. EVs were isolated from the supernatants of hepatocytes treated with vehicle (Veh-EV) or 400  $\mu$ M PA (PA-EV) for 24 hours (left), or hepatocytes transfected with antagomiRs for miR-25, miR-92, and miR-103 (PA-EV<sup>miR-i</sup>), or a control antagomiR (PA-EV<sup>Control</sup>) for 48 hours followed by the treatment with 400  $\mu$ M PA for 24 hours (right) (n=3/group).

(E) EVs were isolated from the supernatants of Huh7 cells treated with vehicle (Veh-EV) or 400  $\mu$ M PA (PA-EV) for 24 hours, or Huh7 cells transfected with antagomiRs for miR-25, miR-92, and miR-103 (PA-EV<sup>miR-i</sup>), or a control antagomiR (PA-EV<sup>Control</sup>) for 48 hours followed by the treatment with 400  $\mu$ M PA for 24 hours. The localization of YAP in HCT116 cells is shown. Representative immunofluorescence staining images (left). Corresponding nuclear/cytoplasmic YAP ratios are shown (right) (n=3/group).

(F) The effect of EVs from PHC isolated from LFD or HFD-fed mice on YAP nuclear translocation in MC38 cells. Four hours after the seeding of PHC from LFD or HFD-fed mice, cells were transfected with a combination of three antagomiRs or a negative control antagomiR (100 nM each) for 48 hours. EVs were collected from the supernatants of PHC (LFD-EV<sup>Control</sup>, LFD-EV<sup>miR-i</sup>, HFD-EV<sup>Control</sup>, or HFD-EV<sup>miR-i</sup>). (n=4/group). Based on immunofluorescence staining images for YAP, nuclear/cytoplasmic YAP ratios were analyzed. Data shown as mean  $\pm$  SEM (A,B,D-F). Significance determined by one-way ANOVA with Tukey's *post hoc* analysis (A,B,F) or two-tailed Student's *t*-test (D,E).

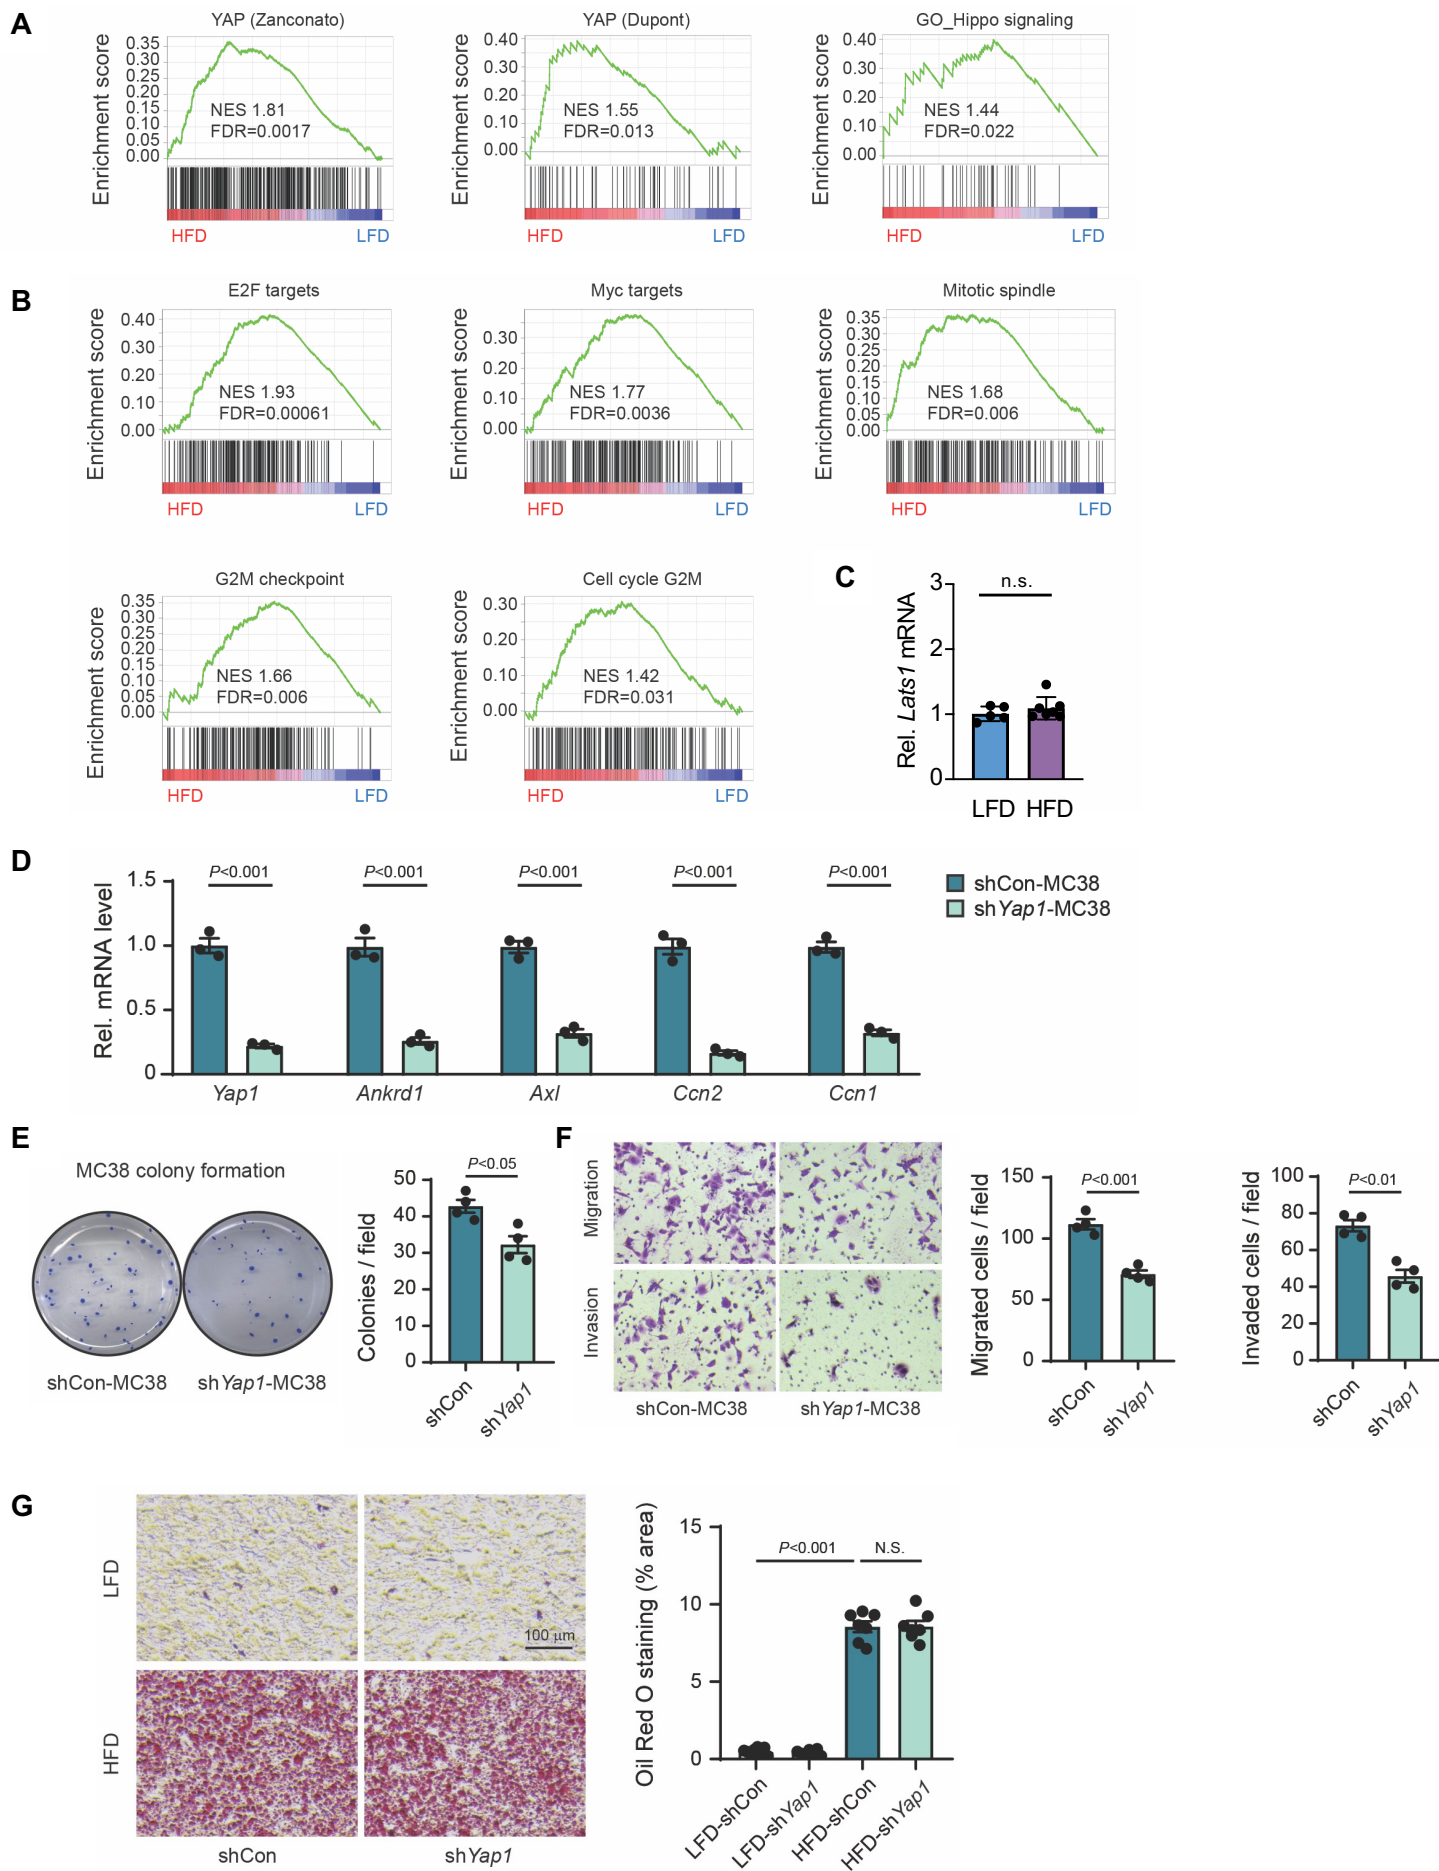

**Fig. S4**

**Figure S4. YAP Activity Contributes to Colorectal Cancer Liver Metastasis Enhanced by Non-Alcoholic Fatty Liver Disease, Related to Figure 4**

(A, B) RNA-seq was performed using tumor samples from procedures described in Figure 1A (n=5/group). GSEA shows that several previously published YAP target gene sets (A) and oncogenic gene sets (B) are enriched in tumors from HFD-fed mice compared with tumors from LFD-fed mice.

(C) qRT-PCR assays for *Lats1* in tumor samples from mice fed a LFD or a HFD (n=5-7/group).

(D) qRT-PCR assays for *Yap1* and its target genes (*Ankrd1*, *Axl1*, *Ccn2*, and *Ccn1*) were performed for MC38 cells stably transfected with scrambled control shRNA (shCon-MC38) or shRNA against *Yap1* (sh*Yap1*-MC38) (n=3/group).

(E,F) The effect of stable knockdown of *Yap1* in MC38 cells on (E) colony formation and (F) cell migration and invasion (n=4/group).

(G) Oil Red O staining of livers from the in vivo experiment (LFD-shCon, LFD-sh*Yap1*, HFD-shCon, and HFD-sh*Yap1*). Representative images (left) and their quantification (right). Data shown as mean  $\pm$  SEM (C-G). Significance determined by two-tailed Student's *t*-test (C-F) or one-way ANOVA with Tukey's *post hoc* analysis (G). n.s., not significant.

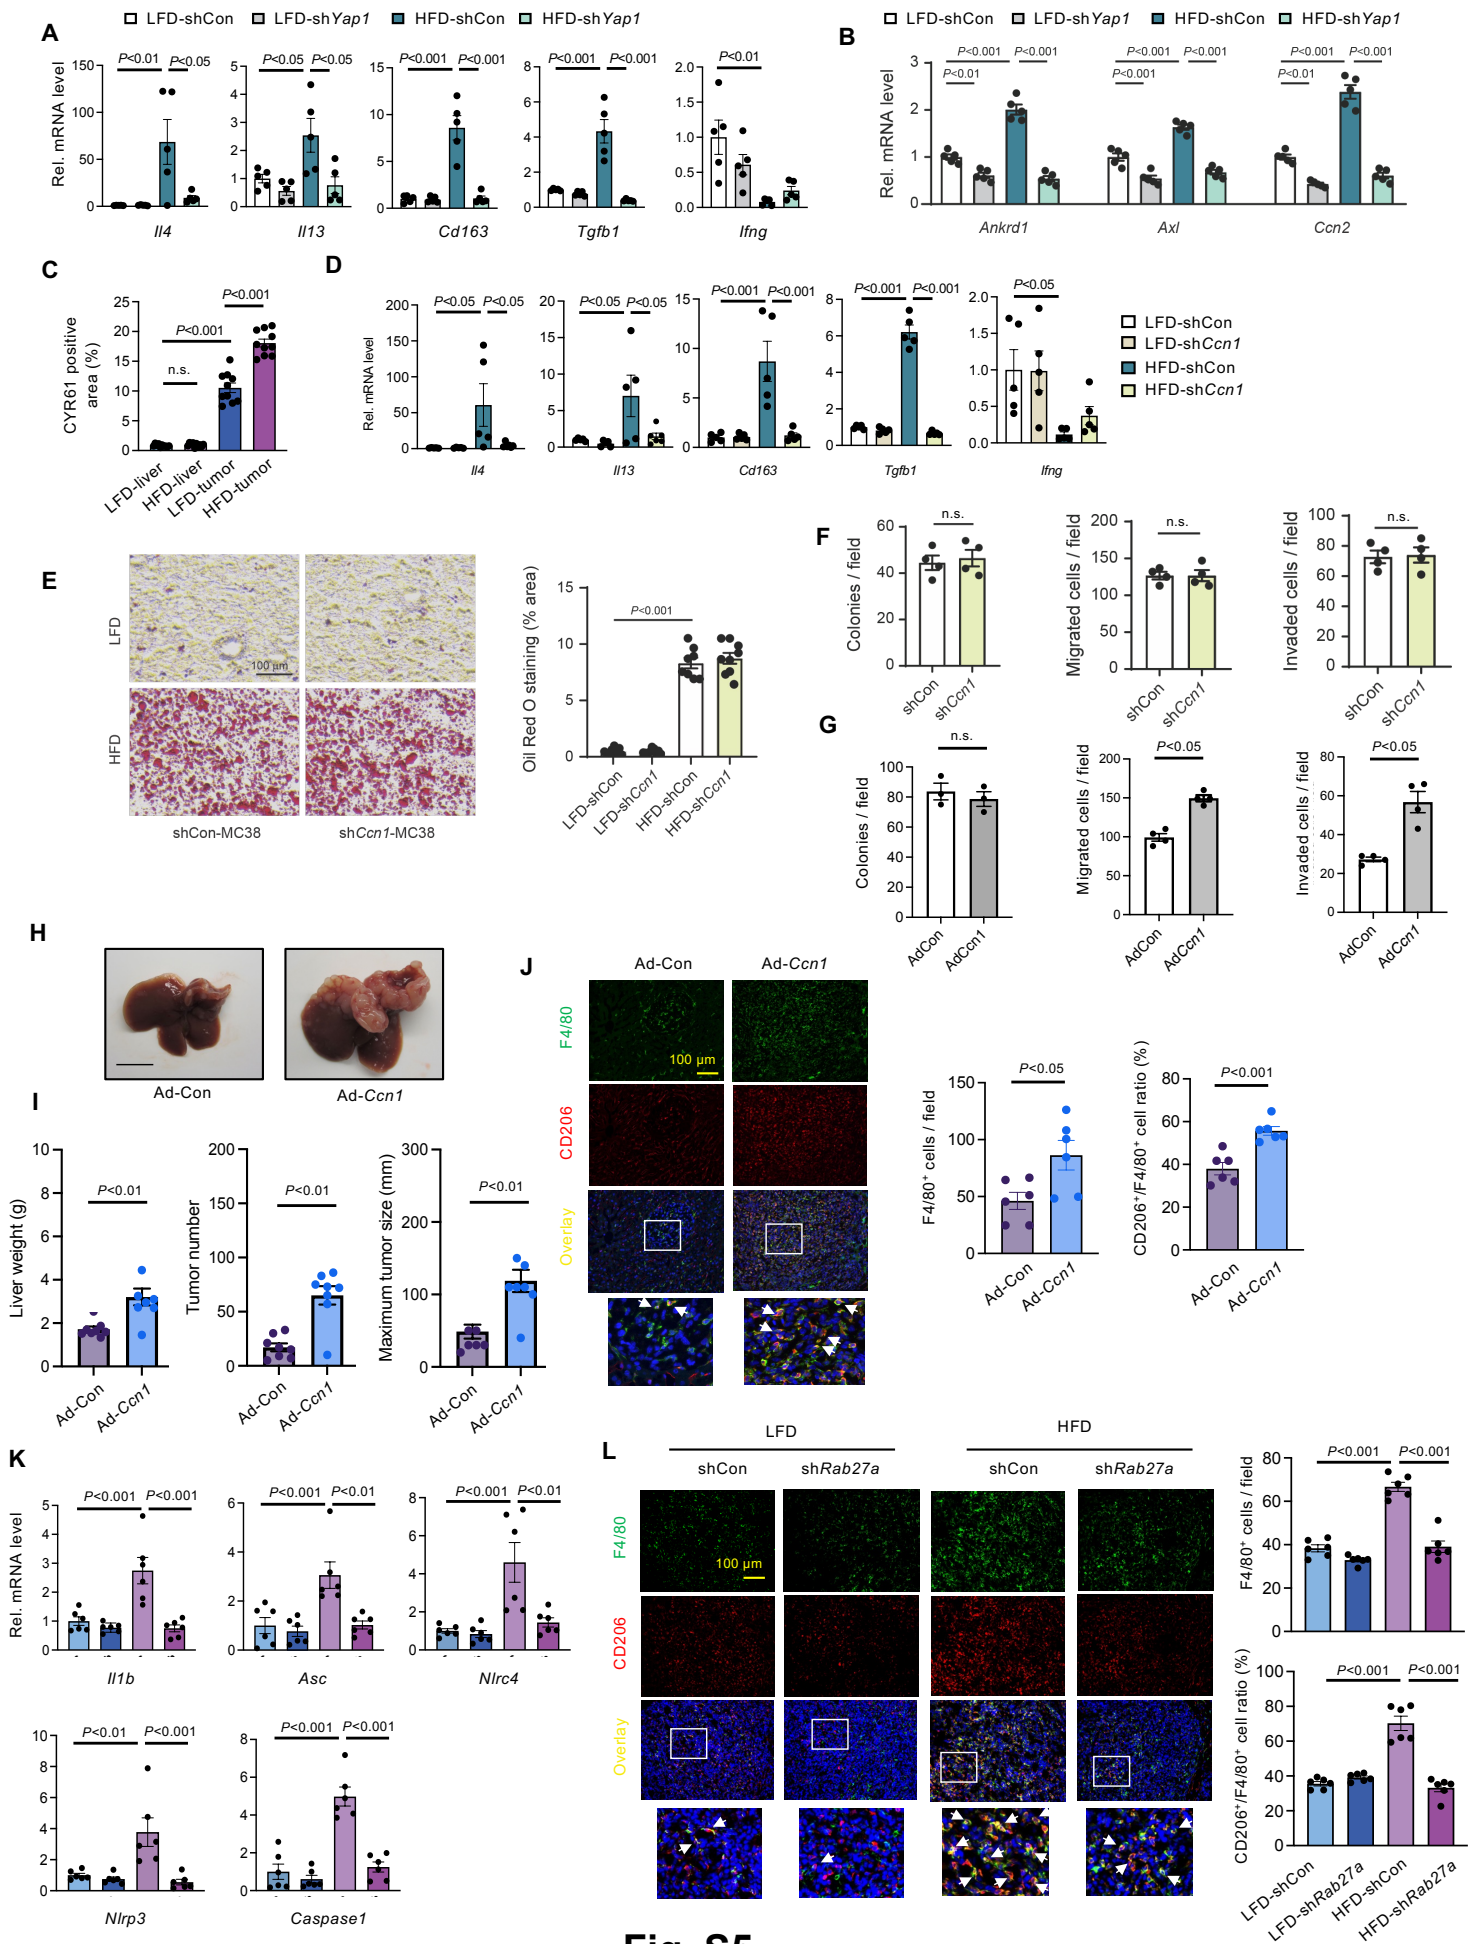

**Fig. S5**

**Figure S5. CYR61 Is the Critical Factor for YAP-Mediated Liver Metastasis by Induction of an Immunosuppressive Tumor Microenvironment, Related to Figure 5**

(A) qRT-PCR assays for M1/M2-related genes (*Il4*, *Il13*, *Cd163*, *Tgfb1*, and *Ifng*) (n=5/group) in tumor samples from Figure 5A (LFD-shCon, LFD-sh*Yap1*, HFD-shCon, and HFD-sh*Yap1*).

(B) qRT-PCR assays for YAP transcriptional target genes (*Ankrd1*, *Axl1*, and *Ccn2*) (n=5/group) in tumor samples from Figure 5D (LFD-shCon, LFD-sh*Yap1*, HFD-shCon, and HFD-sh*Yap1*).

(C) Immunohistochemistry for CYR61 and quantification of CYR61-positive area of non-tumor liver tissues and tumors from mice fed a LFD or a HFD (n=10/group).

(D) qRT-PCR assays for M1/M2-related genes (*Il4*, *Il13*, *Cd163*, *Tgfb1*, and *Ifng*) (n=5/group) in tumor samples from Figure 5F (LFD-shCon, LFD-sh*Ccn1*, HFD-shCon, and HFD-sh*Ccn1*).

(E) Oil Red O staining of livers from the in vivo experiment (LFD-shCon, LFD-sh*Ccn1*, HFD-shCon, and HFD-sh*Ccn1*). Representative images (left), and their quantification (right).

(F) The effect of stable knockdown of CYR61 in MC38 cells on colony formation and cell migration and invasion (n=4/group).

(G) The effect of overexpression of CYR61 in MC38 cells on colony formation (n=3/group) and cell migration and invasion (n=4/group).

(H-J) Adenovirus expressing *Ccn1* (Ad*Ccn1*) or a control adenovirus (AdCon) was administered intravenously to mice. MC38 cells were injected into the spleen 48 hours after adenoviral vector administration (n=8/group). (H) Macroscopic images. Scale bar, 1 cm. (I) Liver weight. Number of metastatic tumors, and maximum tumor size. (J) Co-localization of F4/80 and CD206 in tumors from Figure S5H. Representative immunofluorescent images. Quantification of F4/80<sup>+</sup> cells and ratio of CD206<sup>+</sup>/F4/80<sup>+</sup>.

(K) qRT-PCR assays for inflammasome-related genes (*Il1b*, *Asc*, *Nlrp3*, *Nlrp4*, and *Caspase-1*) (n=6/group) in non-tumor liver tissues and tumor samples from Figure 1K-N (LFD-shCon, LFD-sh*Rab27a*, HFD-shCon, and HFD-sh*Rab27a*).

(L) Co-localization of F4/80 and CD206 in tumors from Figure 1M. Representative immunofluorescent images. Quantification of F4/80<sup>+</sup> cells and ratio of CD206<sup>+</sup>/F4/80<sup>+</sup>.

Data shown as mean ± SEM (A-L). Significance determined by one-way ANOVA with Tukey's *post hoc* analysis (A-E,K,L) or two-tailed Student's *t*-test (F,G,I,J). n.s., not significant.



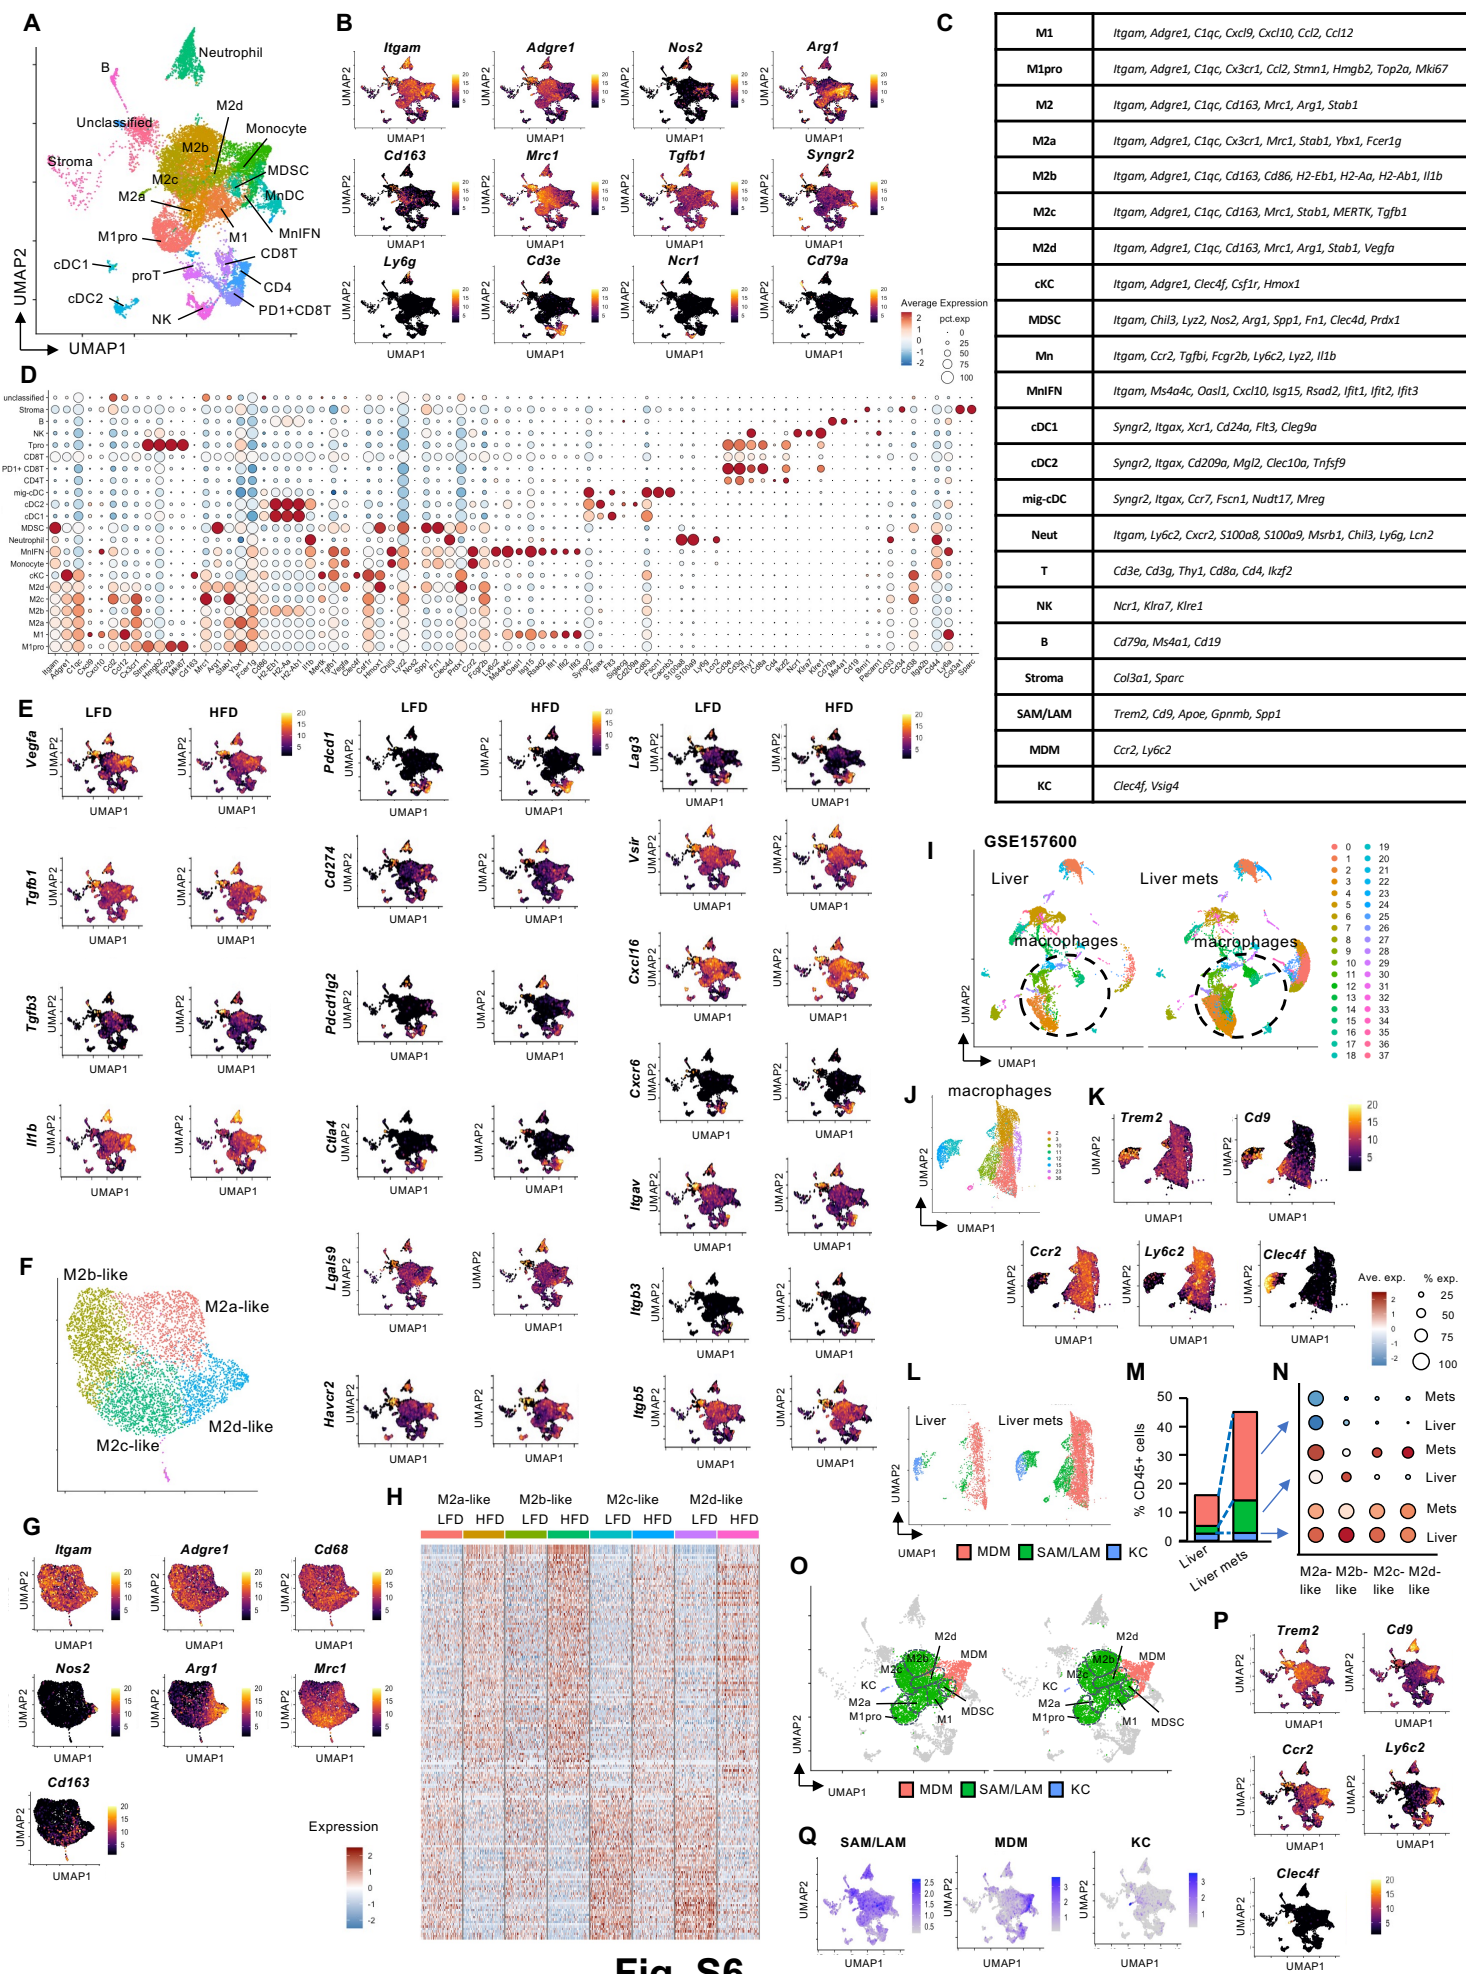

Fig. S6

**Figure S6. Non-Alcoholic Fatty Liver Disease Contributes to Tumor-Promoting Tumor-associated Macrophages and CD8 T Cell Phenotypes in the Tumor Microenvironment of Colorectal Cancer Liver Metastasis, Related to Figure 6**

**(A)** Determination of tumor-infiltrating immune cell populations. UMAP of single-cell RNA-seq analyses from 15,141 CD45<sup>+</sup> immune cells showing 22 clusters determined by integrated analysis, colored by cluster. Cells were isolated from metastatic liver tumors of LFD-fed and HFD-fed mice (n=3/group).

**(B)** Expression levels of key cluster-identification genes.

**(C)** Key cluster-identification genes for each cluster.

**(D)** Dot plot for key cluster signatures (columns) by specific subpopulations (rows) based on Figure S6C. Dot size represents the cell fraction within each subpopulation. Fill color indicates average expression.

**(E)** Expression levels of key tumor-promoting and immunomodulatory genes mapped on the corresponding UMAP embedding.

**(F, G)** UMAPs of re-clustered M2 macrophages and expression of key identification genes for clustering M2 subpopulations.

**(H)** Heatmap of four M2 subpopulations from tumors of LFD-fed and HFD-fed mice at a single-cell level.

**(I)** UMAP of single-cell RNA-seq analyses from GSE157600 showing 27 clusters determined by integrated analysis, colored by cluster. The data contain RNA-seq data from single cells from the normal liver (Liver) and the liver tissues with MC38 tumors (Liver mets).

**(J-L)** **(J)** UMAP of re-clustered macrophages from GSE157600 and **(K)** expression of key identification genes for clustering the subpopulations of myeloid-derived macrophages (MDM), scar or lipid-associated macrophages (SAM/LAM), and Kupffer cells (KC). **(L)** UMAP of re-clustered macrophages from Liver and Liver mets.

**(M,N)** **(M)** Bar plots depict the proportion of MDM, SAM/LAM, and KC in CD45<sup>+</sup> cells in Liver and Liver mets. **(N)** Dot plot for expression of signatures of M2 subpopulations (columns) by macrophage subpopulations (MDM, SAM/LAM, KC) from livers with or without tumors (rows). Dot size represents the cell fraction within each cell population. Fill color indicates average expression.

**(O-Q)** **(O)** UMAPs of clustered SAM/LAM, MDM, and KC in tumors of LFD-fed and HFD-fed mice. **(P)** Expression of key identification genes for SAM/LAM, MDM, and KC in tumors of LFD-fed and HFD-fed mice. **(Q)** Summarized expression levels of cell type specific gene signatures for SAM/LAM, MDM, and KC.

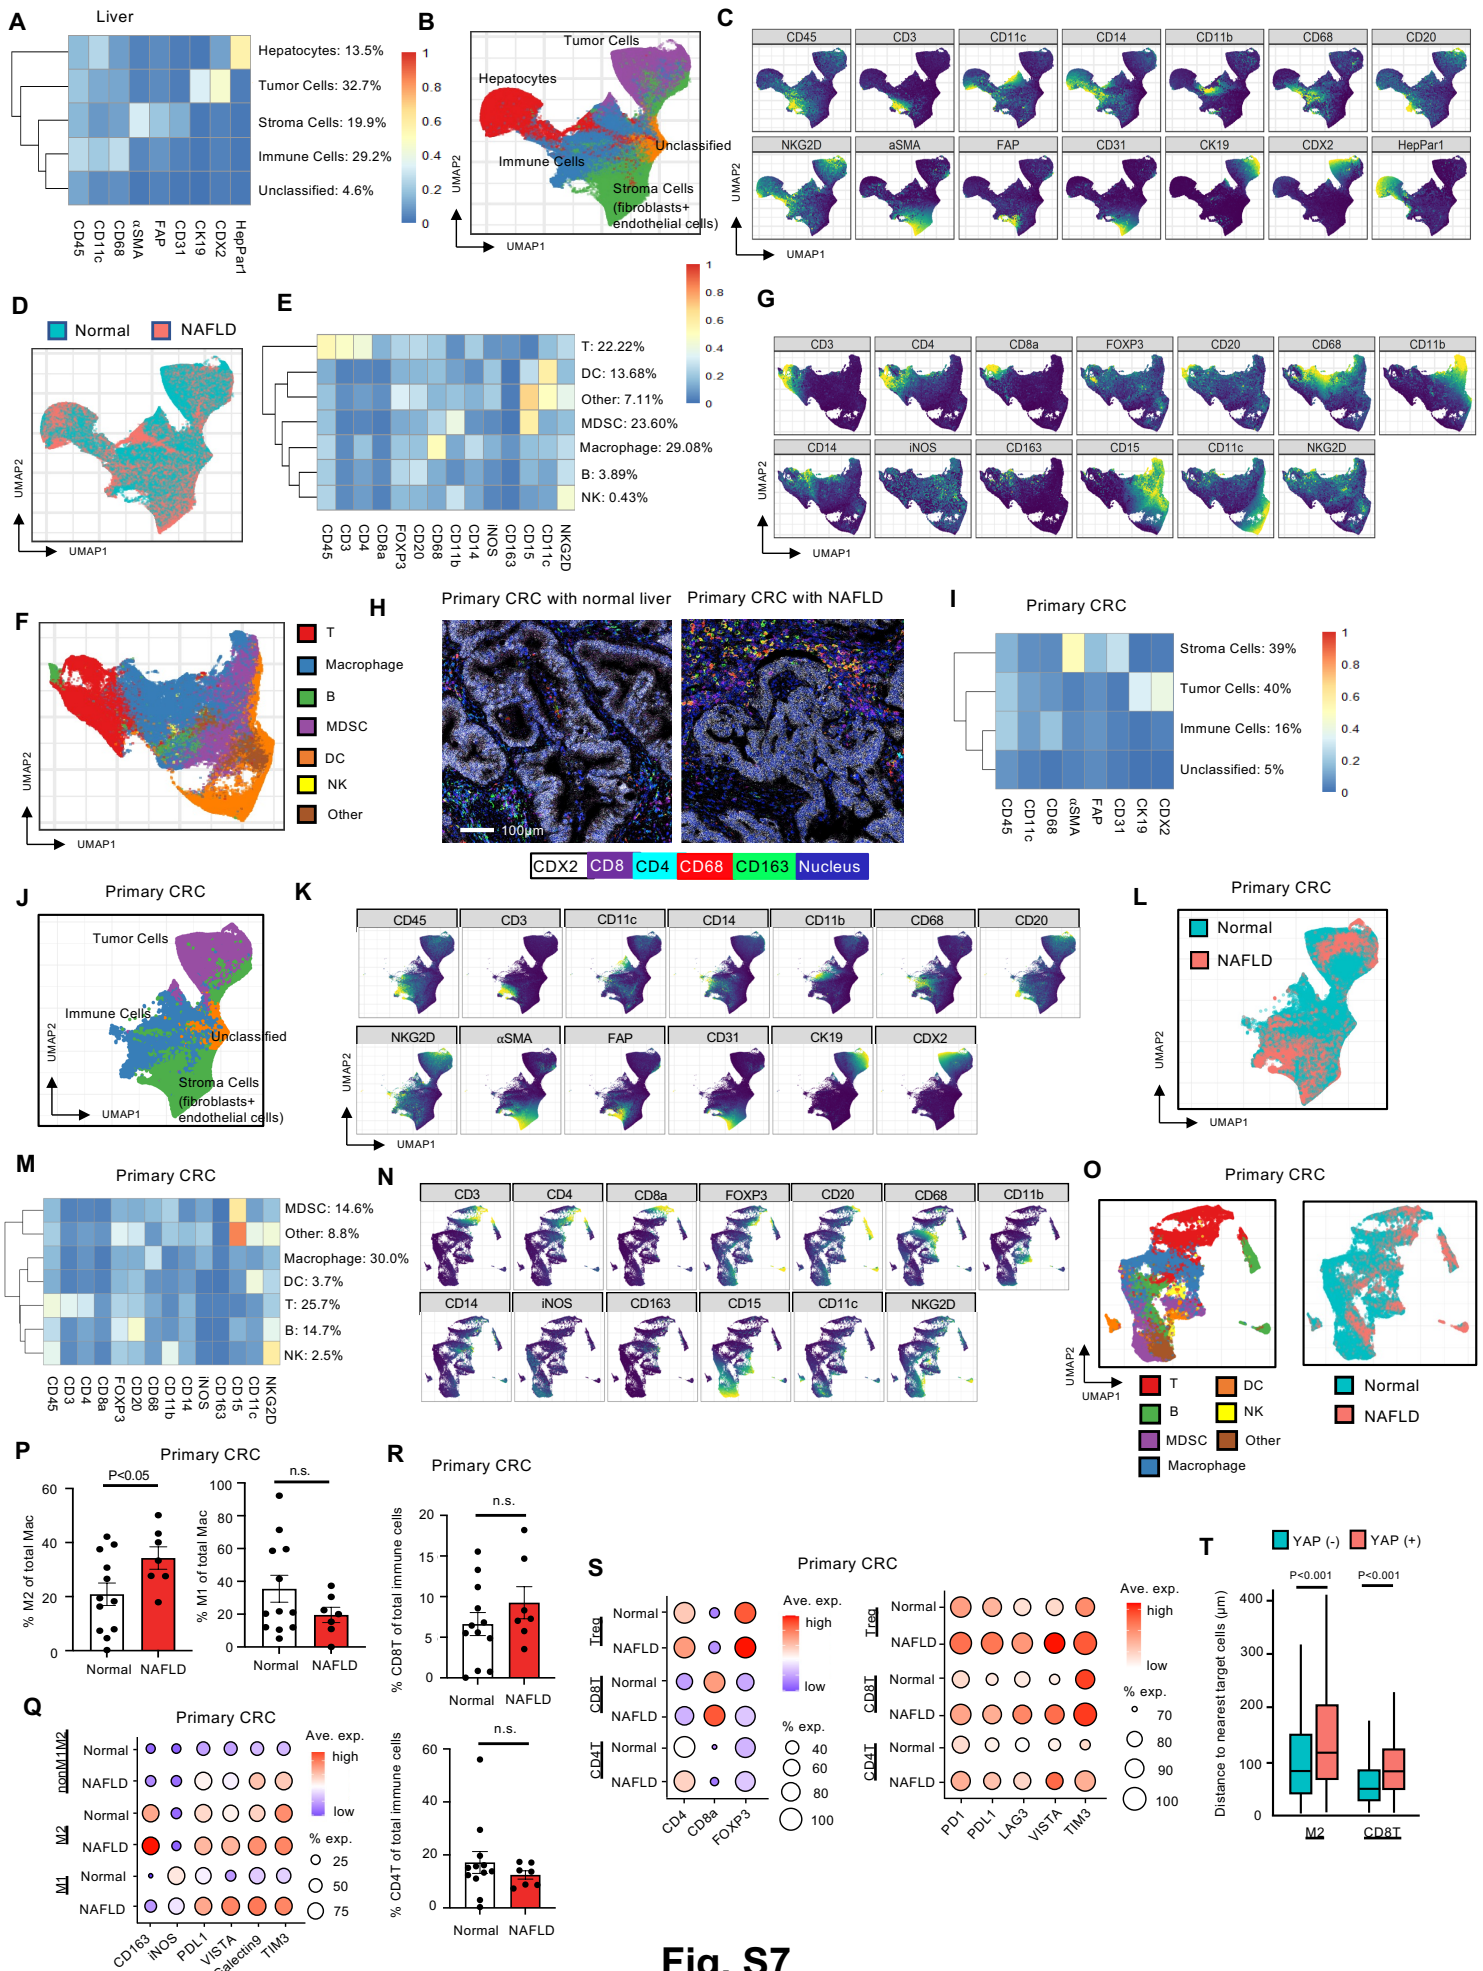

**Figure S7. Increased YAP Activity and Immunosuppressive Tumor Microenvironment in Colorectal Cancer Liver Metastasis Patients with Non-Alcoholic Fatty Liver Disease, Related to Figure 7**

**(A-G)** IMC analysis of TMA comprising patients with CRC liver metastasis with NAFLD (n=13) and without NAFLD (n=17; Normal).

**(A)** Heatmap of cell populations determined by key cluster-identification molecules from IMC analyses from 430,306 cells.

**(B)** UMAP from **(A)** showing five clusters determined by integrated analysis, colored by cluster.

**(C)** UMAPs of expression of key cluster-identification molecules.

**(D)** UMAPs colored by NAFLD condition.

**(E)** Heatmap of immune cell populations determined by key cluster-identification molecules from IMC analyses from 147,328 immune cells.

**(F)** UMAP from **(E)** showing seven clusters determined by integrated analysis, colored by cluster.

**(G)** UMAPs of expression of key immune cluster-identification molecules.

**(H-T)** IMC for TMA comprising primary CRC from liver metastasis patients with NAFLD (n=7) and without NAFLD (n=12; Normal).

**(H)** Representative IMC images for primary CRC for CDX2, CD8, CD4, CD68, and CD163 expression.

**(I)** Heatmap of cell populations determined by key cluster-identification molecules from IMC analyses from 308,551 cells.

**(J)** UMAP from **(I)** showing four clusters determined by integrated analysis, colored by cluster.

**(K)** UMAPs of expression of key cluster-identification molecules.

**(L)** UMAPs colored by NAFLD condition.

**(M)** Heatmap of immune cell populations determined by key cluster-identification molecules from IMC analyses from 63,419 immune cells.

**(N)** UMAPs of expression of key immune cluster-identification molecules.

**(O)** UMAP from **(M)** showing seven clusters determined by integrated analysis, colored by cluster (left). UMAP of immune cells, colored to distinguish normal and NAFLD conditions (right).

**(P)** Quantification of CD163-expressing (M2) and iNOS-expressing (M1) macrophages (Mac).

**(Q)** Dot plot for expression of key cluster-identification and immunomodulatory molecules (columns) by macrophage subpopulations from patients with or without NAFLD (rows). Dot size represents the cell fraction within each cell population. Fill color indicates average expression.

**(R)** Quantification of CD8 and CD4 T cells.

**(S)** Dot plot for expression of key cluster-identification and immunomodulatory molecules (columns) by T cell subpopulations in patients with or without NAFLD (rows). Dot size represents the cell fraction within each cell population. Fill color indicates average expression.

**(T)** Spatial analysis of IMC to measure the distances between immune cells (M2 macrophages or CD8 T cells) and primary CRC cells with and without YAP expression (n=130,364 cells). Data

shown as mean  $\pm$  SEM (P,R) or mean  $\pm$  SD (T). Significance determined by two-tailed Student's *t*-test (P,R,T).
